# Supplementary material for: Identification and expression analysis of xyloglucan endotransglucosylase/hydrolase (XTH) family in grapevine ( Vitis vinifera L.)
Source: PeerJ journal article supplement (doi:10.7717/peerj.13546), 2022-06-13
Supplement: RAW_DATA.zip [file RAW_DATA.zip]

VvXTH01/1-280  
VvXTH02/1-314  
VvXTH03/1-308  
VvXTH04/1-342  
VvXTH05/1-295  
VvXTH06/1-282  
VvXTH07/1-280  
VvXTH08/1-282  
VvXTH09/1-282  
VvXTH10/1-292  
VvXTH11/1-281  
VvXTH12/1-294  
VvXTH13/1-301  
VvXTH14/1-295  
VvXTH15/1-291  
VvXTH16/1-292  
VvXTH17/1-322  
VvXTH18/1-370  
VvXTH19/1-298  
VvXTH20/1-286  
VvXTH21/1-279  
VvXTH22/1-313  
VvXTH23/1-297  
VvXTH24/1-298  
VvXTH25/1-297  
VvXTH26/1-297  
VvXTH27/1-270  
VvXTH28/1-297  
VvXTH29/1-263  
VvXTH30/1-273  
VvXTH31/1-297  
VvXTH32/1-323  
VvXTH33/1-252  
VvXTH34/1-285

.....  
.....MA.....LLQKKLLASLL  
.....QLSLPLGTKMASCL.....WL...LSLGL  
.....MG.....QLPVIRNFSLF  
.....MNDYHKL.....F.....FIGV  
.....M.....GS...SSNGY  
.....M.....GF...SSYEY  
.....M.....GS...SSNGY  
.....M.....GS...SSNRY  
.....MA.....PLLCLL  
.....MAS.....LLA  
.....MA.....FFIFLV  
.....ME..L.....QA...SPVPI  
.....MEAF.....SS...PKVSS  
.....MAPCF.....SL...NISSM  
.....M.....GSFQV  
MLKFDEWCLGNGKVDLHFSLLNPCKIRLLTEPSSSRSPSTFPHDYYKTPTYPRHSLHFHAQNYFHSSSLNSHSMASPS...TW..NLSPK  
.....MAPIC.....S.....SS...SAVST  
.....MAS  
.....MPTKCSIIPPQLKYHFQVSVTYSMAS.S...PF...SSSSL  
.....MASPS.....TS...NLSPK  
.....S.....SS...SAVST  
.....MAPIY.....MASPS.....TS...NLSPK  
.....MTYPT.....TS...NLSPK  
.....MAPIY.....S.....SS...SAVST  
.....MASTS.....TS...NLSPK  
.....MAPIY.....S.....SS...PAVPT  
.....MAVPS.....VLPL  
.....MAKS.....LFICSI  
MVMEYSLVDLIRHVITQVGT  
.....MST

VvXTH01/1-280  
VvXTH02/1-314  
VvXTH03/1-308  
VvXTH04/1-342  
VvXTH05/1-295  
VvXTH06/1-282  
VvXTH07/1-280  
VvXTH08/1-282  
VvXTH09/1-282  
VvXTH10/1-292  
VvXTH11/1-281  
VvXTH12/1-294  
VvXTH13/1-301  
VvXTH14/1-295  
VvXTH15/1-291  
VvXTH16/1-292  
VvXTH17/1-322  
VvXTH18/1-370  
VvXTH19/1-298  
VvXTH20/1-286  
VvXTH21/1-279  
VvXTH22/1-313  
VvXTH23/1-297  
VvXTH24/1-298  
VvXTH25/1-297  
VvXTH26/1-297  
VvXTH27/1-270  
VvXTH28/1-297  
VvXTH29/1-263  
VvXTH30/1-273  
VvXTH31/1-297  
VvXTH32/1-323  
VvXTH33/1-252  
VvXTH34/1-285

.....  
.....MSLDERTSGSGLISQDLYLHGFFSASIKLPAD.  
VIF...GISAAVSAGNGHDAAPNVTRLTDLFGHLTFNHGFTTEFFGGSNIQPINNGSYANLILNKSSGSGGLVVSQSKYYYGFFSSAAIKLPSSG.  
L.FMVSGAR...G.....AAPRKPIDVFFGRNYVPTWAFDHIKSYNGSGEIQLVLDKYTGTFQSKGSYLFHGHSMQIKMVPG.  
FFF...FVSFFCA.....ASSFNLSVISFDQGYTHLFGEGNLVRSDDGRSVRLLDORYTSGSGFISANLYNHGFFSANIKLPSE.  
L.TLISLVQ...V.....SDASVSTGDFNKDFFVFIWSPSHVNTSADGHARSLKLDKESGAGFASNQLFLFGQIDMQIKLVGT.  
S.VFLLLF...V.....VVATASASNFYQDFDLTWGDNRAKIFNNGQLLSLSLDQASGSGGFQSKKEYLFGRIDMQIKLVAG.  
S.VLVLVLA...M.....MVATASASNFYQDFDITWGDHRAKMFNGQLLSLSLDKVSQSGGFQSKKEYLFGRIDMQIKLVAG.  
S.FFGLVFA...M.....VLATASASNFYQDFDITWGDHRAKIFNNGQLLSLSLDKTSQSGGFQSKKEYLFGRIDMQIKLVAG.  
S.FFCLVFA...M.....VLATASAGNFYQDFDITWGDHRAKIFNNGQLLSLSLDKTSQSGGFQSKKEYLFGRIDMQIKLVAG.  
ILM.....ITTCSDAQGPPSPGF...SPSSKFSPISFNQGFRLNWGSQH...TIDQGLLTIWLDSTSGSGFQSKLKPYRSGYFSSAAIKLQPG.  
L.LLAFLLG...A.....VVGTKMSDITFDQSYRITWGNDRHVLNQLRVLVQLSLDQSSGAGFASKQSYGSGFFHMRILKLPK.  
LVL...MVPSSNAQWPPSPGY...YPSRKFRSMFQYQGFRLNWGPQH...RVDQNALTIWLDSTSGSGFQSVRPFRRSGYFSGASIKLQPG.  
LLCIAALMAASCPP.....SQAEGQSKSFEDSFDIMWSEDFHFKTSEDQIWIYLSLDKETGCGFQTKQRYRFGWFSMKLKLVG.  
L.LFSLVFS...S.....LMATASAGNFYQDFDLTWGDRRAKILVDGKLLMLSLLDRASGSGGFQSKKEYLFGRIDMQIKLVSG.  
L.LFSVVFVS...S.....IMA.ASAGSFYQDFDLTWGDRRAKILVDGKLLMLSLLDRASGSGGFQSKKEYLFGRIDMQIKLVSG.  
L.FVALLVTA...V.....AFEQSFVDANFSKSMYFNWGASHSSILNGDDDLQLVLDSTSGSGVQTKRAFLLGSIEMLIKLVPG.  
.....MAASAGNFYQDFDITWGDGRAKILNNGELLLTSLDKTSQSGGFQSKNEYLFGRIDMQIKLVPG.  
L.FLVSLLL...G.....SFVVASVGNLYQDFEITWGDGRAKILNNGELLLTSLDKTSQSGGFQSKNEYLFGRIDMQIKLVPG.  
A.LLMSVVV...S.....FLMAASAGNFYQDFDITWGDGRGKILNNGELLLTSLDKTSQSGGFQSKNEYLFGRIDMQIKLVPG.  
S.SILVLM...S.....MLVVASGGNFQDFDITWGDGRAKILNNGQLLTSLDKASGSGGFQSRNEYLFGRIDMQIKLVSG.  
.....MA...A.....SFIAVSAGTLYEDIDIKWGDDRAKILNNGQLLTSLDRTCCAGFQSKNEYLFGRIDMQIKLVPG.  
L.GLVVMF...C.....SLMAASAGNFYQDFDITWGNDRRAKLLDKGQLLTSLDRAASGSGGFQSKNEYLFGRIDMQIKLVPG.  
L.LLLSLLF...G.....SFVVASVGNLYQDLDTWGDGRAKILDNGQLLTSLDKASGSGGFQSQDEYLFGRIDMQIKLVPG.  
A.LLISVVV...S.....FLMAASAGNFYQDFGITWGDGRAKILDNGEFLTSLDKTSQSGGFQSKNEYLFGRIDMQIKLVPG.  
L.LLMSLLL...G.....SFVVASVGNLYQDFDLTWGDGRAKILNNGQLLTSLDKASGSGGFQSKNEYLFGRIDMQIKLVPG.  
L.LLLSLLL...G.....SFVVASVGNLYQDFDITWGDGRAKILNNGQLLTSLDKASGSGGFQSRNNEYLFGRIDMQIKLVPG.  
A.LLISVVV...S.....FLMAASAGNFYQDFDITWGDRAKILDNGEFLTSLDTSQSGGFQSKNEYLFGRIDMQIKLVPG.  
L.LLLSLLL...G.....SFVVASVGNLYQDFDLTWGDGRAKILNNGQLLTSLDKASGSGGFQSKNEYLFGRIDMQIKLVPG.  
.....MLFSFLTFLAKILDNGQLLTSLDKTSQSGGFQSKNEYLFGRIDMQIKLVPG.  
A.MHISVVV...S.....FLMAASAGNFQDFDITWGDGRAKILNNGELLLTSLDKTSQSGGFQSKNEYLFGRIDMQIKLVPG.  
L.FGFLAFSV...V.....VFVGSASSKFTELFQPGWAFDHF...LYEGELLLKLLDNYSGAGFSSSKSYMFGKVSIOIKLVGE.  
LLLLNSFLSFRSSATNLAYSTPF...DRWFFKVFGDEN.....IKSVHNGTVAKISLDQKTTGSEFVSSDIFLHGYSFASIKLPRNQ  
IRFLVKSLDEEILQISGSLNPPH...TGSLFMIFCSSQSLAARNGTSEFPYFATRNLEISLDQKTTGSELVSSNIFLHGYSFASIKLPRSQ  
L.FLVALMAL...A.....IVQNSAMSDDFNQLEQPNWAPDHI...STEGDQIKLTLDTISGCGFESKKKYLFEGKVSQVQKLVGE.
