# Supplementary material for: Identification and expression analysis of xyloglucan endotransglucosylase/hydrolase (XTH) family in grapevine ( Vitis vinifera L.)
Source: PeerJ journal article supplement (doi:10.7717/peerj.13546), 2022-06-13
Supplement: RAW_DATA.zip [file RAW_DATA.zip]

## Sheet: Sheet1
			New Place	Abiotic and biotic stress	Phytohormone responsive	Plant growth and development	PlantCare	Conserved promoter motifs	ABA, Dehydration & salinity (osmotic) stress responsive	Heat and cold stress realted	Phytohormone responsive	Light responsive
VIT_201s0011g06250.1		VvXTH1		10	1	8		41	31	2	19	49
VIT_201s0026g00200.1		VvXTH2		22	16	5		24	53	10	24	67
VIT_201s0150g00460.1		VvXTH3		13	15	3		6	42	2	9	41
VIT_202s0012g02220.1		VvXTH4		11	7	2		55	38	1	26	51
VIT_203s0088g00650.1		VvXTH5		17	3	5		36	33	4	28	20
VIT_205s0062g00240.1		VvXTH6		14	7	9		39	42	3	19	52
VIT_205s0062g00250.1		VvXTH7		17	12	2		17	41	0	6	27
VIT_205s0062g00480.1		VvXTH8		17	7	3		50	39	5	16	81
VIT_205s0062g00610.1		VvXTH9		15	3	6		49	44	6	15	71
VIT_206s0061g00550.1		VvXTH10		12	5	4		27	73	10	14	60
VIT_207s0185g00050.1		VvXTH11		18	10	9		49	52	4	22	73
VIT_208s0007g04950.1		VvXTH12		21	8	5		37	62	10	20	59
VIT_210s0116g00520.1		VvXTH13		16	5	4		30	69	13	30	50
VIT_210s0003g02440.1		VvXTH14		11	4	6		37	39	7	24	37
VIT_210s0003g02480.1		VvXTH15		14	5	7		23	47	5	16	39
VIT_211s0016g03480.1		VvXTH16		16	18	2		34	46	7	13	61
VIT_211s0052g01180.1		VvXTH17		10	2	3		38	57	4	18	80
VIT_211s0052g01190.1		VvXTH18		14	5	3		35	42	5	16	55
VIT_211s0052g01200.1		VvXTH19		17	5	3		24	66	5	19	54
VIT_211s0052g01220.1		VvXTH20		23	3	4		26	60	2	13	64
VIT_211s0052g01230.1		VvXTH21		16	2	6		27	49	6	22	45
VIT_211s0052g01250.1		VvXTH22		20	2	5		30	50	6	17	65
VIT_211s0052g01260.1		VvXTH23		9	1	2		27	27	5	19	56
VIT_211s0052g01270.1		VvXTH24		17	2	2		28	58	11	20	55
VIT_211s0052g01280.1		VvXTH25		14	8	3		41	50	6	17	72
VIT_211s0052g01300.1		VvXTH26		10	6	3		36	42	3	20	51
VIT_211s0052g01310.1		VvXTH27		19	5	4		19	60	6	17	57
VIT_211s0052g01320.1		VvXTH28		17	6	2		30	48	6	15	56
VIT_211s0052g01330.1		VvXTH29		15	1	4		26	39	7	22	46
VIT_211s0052g01340.1		VvXTH30		25	2	3		30	49	11	22	48
VIT_212s0134g00160.1		VvXTH31		21	11	3		24	60	2	21	59
VIT_215s0048g02850.1		VvXTH32		31	24	15		44	18	3	30	58
VIT_216s0100g00170.1		VvXTH33		14	24	3		23	72	4	26	64
VIT_217s0053g00610.1		VvXTH34		22	1	3		44	45	5	23	40

## Sheet: Plant Care
	ARE	AT1-motif	AT-rich element	ATCT-motif	ATC-motif	Box II	DRE	G-box	GT1-motif	LAMP-element	LTR	MBS	MYB	MYC	Sp1	STRE	TC-rich repeats	TCCC-motif	TCT-motif	W box	WUN-motif	ABRE	as-1	CARE	CGTCA-motif	ERE	GARE-motif	P-box	TATC-box	TCA-element	TGACG-motif	TGA-element	A-box	AE-box	Box 4	CAT-box	circadian	GA-motif	GATA-motif	GCN4_motif	I-box	MRE	O2-site	RY-element
VvXTH1	3			1					1					2		2				1								1							4					2	2
VvXTH2	5							3	2				4	3		2		1		2		4	2		2	3	1	1	1		2				2	1					1		1
VvXTH3								1	1		1	1	1	4		3				1			3		3	1		3	1	1	3					3
VvXTH4	2		1					2	1				3				1			1		1				4			1	1					1							1
VvXTH5	1		1			1			3		1	1	5	4												1				1		1			1	1				2				1
VvXTH6	1	1							1			1	1	4	1	4							1	1	1	3					1			1	5						1	2
VvXTH7	1	1						3	2			1	2	3		2				1	1	3		1		2		2		4					2
VvXTH8	3	3	1									1	1	2		2	1		2		1			1		6													2				1
VvXTH9	2	2										1	2	1		2	1		2		2			1		2								1			1		2		1		1
VvXTH10	4								1			1	3			1	2						1		1			1		1	1		1		1						1	1
VvXTH11	2							3	3			1	3	3		1		1		1		2	1		1	5					1			1	8
VvXTH12				1				1	1		1	2	4			7		2	1	1		2	1		1	2		1			1				3	1							1
VvXTH13	2							1				1	3	6			1		1		1	3				2							1	1		1					1
VvXTH14	3												2	2		2		1			1					3				1					3	2		1
VvXTH15	4							1	3				5			1						2				1		1		1					4	2					1
VvXTH16	1							2	1	1		1		4		2	1			2	1		5		5	1			1	1	5					1					1
VvXTH17	1											2	3	2		1		1												2					2	1
VvXTH18	4				1						1	1	2	2		1	1				1					4				1				1								1	1
VvXTH19	1							1	1		1	3	4	4		2							1		1			2			1					1	1						1
VvXTH20								1				2	8	4	1	3				2	2	1				2									2	1							1
VvXTH21	2			1	3			1			1	2	2	3					1			1								1				1	4				1
VvXTH22	1							1	3			1	5	3		3			2		1	1							1						2	2								1
VvXTH23									2				2	2		1				1	1								1					1	1
VvXTH24	1						1				1	1	5	2		2			3		1					1		1							1			1
VvXTH25	3	1	1					1				1	3	3		1						3				5							1							2
VvXTH26		1	1							1	1		2	2				1			1					3		2		1					2							1
VvXTH27	2						1				1	1	6	2	2	3					1		1		1	1		1			1			1	1	2
VvXTH28	3		1					1				1	1	4	1	2			1	2		3				1			1	1										2
VvXTH29	2			1					1	1	1	1	2	2		1				2	1					1								1	3
VvXTH30			1								2	2	11	3	1	2		1	1		1						1			1				1		1							1
VvXTH31	1		1					6				2	3	1	1	3	1	1	1			8	1		1						1					2					1
VvXTH32	2	1		2		1		4	2			2	6	5	1		1	1	3			6			6	3		1		2	6				10	1			1		1			2
VvXTH33	1							4				2	3	3	1							6	5		5			1		2	5				2	1
VvXTH34	2		1			1		1	5			1	5	4		1					1	1														1					1	1

## Sheet: New Place
	-10PEHVPSBD	BOXCPSAS1	EBOXBNNAPA	GATABOX	GT1CONSENSUS	IBOXCORE	MARTBOX	PALBOXPPC	REALPHALGLHCB21	SORLIP1AT	SORLIP2AT	SORLIP5AT	TBOXATGAPB	Light responsive	ABRELATERD1	ACGTATERD1	BOXLCOREDCPAL	CURECORECR	DPBFCOREDCDC3	DRE2COREZMRAB17	DRECRTCOREAT	EECCRCAH1	GT1GMSCAM4	MYB1AT	MYB2AT	MYB2CONSENSUSAT	MYBCORE	MYBCOREATCYCB1	MYBPLANT	MYBPZM	MYBST1	MYCCONSENSUSAT	PREATPRODH	SITEIIATCYTC	ANAERO1CONSENSUS	ABA, Dehydration & salinity (osmotic) stress responsive	ARFAT	ARR1AT	CAREOSREP1	GARE1OSREP1	PYRIMIDINEBOXHVEPB1	PYRIMIDINEBOXOSRAMY1A	T/GBOXATPIN2	TATCCAOSAMY	Phytohormone responsive	CBFHV	CCAATBOX1	LTRE1HVBLT49	LTRECOREATCOR15
VvXTH1	2		8	13	16	9							1	49					1			2	4	3		2	2	2			2	8	2		3	31		19							19	2
VvXTH2	1	1	24	11	15	6		1		5	3			67		4	1	2	1		1	1	1			1	4	1	2	1	4	24		4	1	53	1	14		1		6		2	24	1	7	1	1
VvXTH3				11	15	6		1		5	3			41									1			1	4	1	2	1	4	24		4		42				1		6		2	9			1	1
VvXTH4				10	18	5	16			2				51	1	2						3	7	3	1	2	5	1	1		5		2		5	38		18	3	2		3			26		1
VvXTH5	3					7			6	2			2	20			1		1				4	4		1	1		4	2	2	10	1	2		33	1	21	1		1	3		1	28	2		1	1
VvXTH6			16	7	16	2	6			1	1	2	1	52		6	1	2				3	6	1		1	1		1		1	16			3	42	2	14				2		1	19		3
VvXTH7	2						19		2	2	2			27	2	4			1				3	1		1	2		1	4	3	16	1	2		41			1			4		1	6
VvXTH8	2	2	10	12	29	5	14	1	4				2	81									13	3		1	1		2		2	10	4	1	2	39	1	10	2			1		2	16	1	4
VvXTH9	1	1	8	4	29	4	18		5				1	71				2					11	2		1	1	1	4	4	2	8	3	1	4	44	1	10			2			2	15	1	5
VvXTH10	1	1	18	4	19	2	3		6	2	1	2	1	60		2	4	20	1			2	5	7		1	3		4	3		18		1	2	73	1	8	2	1		2			14	4	5		1
VvXTH11	1		12	15	24	2	13		5				1	73	2	8	1			1	1	3	11	3		2	2	1		1		12		1	3	52		14	2		1	5			22	1	2		1
VvXTH12	1		10	8	14	5	14		1	5	1			59	2	6	1	12			1	3	4	2	1	4	5	1	1	2	3	10		1	3	62	1	13				4		2	20	2	6	1	1
VvXTH13	2		18	8	14	2	2		2	1			1	50	3	10	5	8	1	2	2	2	4	3		1	2		1	2		18	2		3	69		25			2	2	1		30	3	7		3
VvXTH14	1		6	9	13	3			1	2	1		1	37		6		6	1			2	4	4	1	1	2	1			2	6	2	1		39		22			1	1			24		7
VvXTH15	1		4	11	10	3	2		3	2	1	1	1	39	2	4	1	4	3				6	6		2	5	3	2	3	1	4			1	47		11	1			2	1	1	16		4		1
VvXTH16	2		16	9	18	5	3		2	4			2	61		4		2	4			2	3	1		2	3	3		1	2	16		1	2	46		9	1		1	2			13		7
VvXTH17	3	2	16	15	21	6	13		1	2			1	80		2	2	10	1			3	7	1		2	3	2	1	1	1	16	3	2		57	1	16				1			18		4
VvXTH18	2		10	12	14	5	4		3	1	2		2	55			1	4				6	3	4	1	2	3			2	4	10		1	1	42		15	1						16	1	3	1
VvXTH19	2		26	9	9				1	4	2		1	54			3	4	1		1	4	4	1	1	4	6			3	3	26	2	2	1	66		15	1			3			19	1	2	1	1
VvXTH20		1	18	15	9	5			2	4	7		3	64	1	2	4		1			3	1	1	1	3	5		4	4	2	18	2	5	3	60		11					1	1	13		2
VvXTH21	2		16	15	8	2			1				1	45	1	4		2	2	1	1	2	3	2		2	3			2	4	16	1	1	2	49		16			1	1	1	3	22	1	3	1	1
VvXTH22	3		16	15	18	7			2	3		1		65	1	2	1	8	4			2	8	1		1	2			2	1	16	1			50		13				4			17		6
VvXTH23	3		8	13	19	5	6			1		1		56			1	2		1	1	1	6	1	1	1	2				1	8			1	27	1	14	1			3			19	1	3		1
VvXTH24	2		22	7	14	1			2	2	1		4	55			2	6	1	1	2	2	8	1	1	2	4	1	1	2		22	1		1	58		17				3			20	2	5	1	3
VvXTH25	2		16	16	11	4	16		5	1	1			72	1	2	1	4	2			1	1	4		1	1	2	2	1	5	16	3	1	2	50		12	1			1		3	17		6
VvXTH26	2		12	11	16	4	5		1					51		6	1	6	1			3	4	1			1		1		1	12	2	2	1	42		15	1			3		1	20		2	1
VvXTH27	2		22	12	12	1			2	3	1		2	57		2	2	6	2		1	3	5	2	1	3	4	1	2	2	1	22			1	60		13	1			3			17	1	1	1	3
VvXTH28	2		16	16	14	5			1	1			1	56	1	2		4	1			3	2	3		1	3			3	5	16	4			48		9		1		1		4	15	1	5
VvXTH29			8	13	12	5	2		1	1	2		2	46		2	1	2	1			4	3	2	1	2	2			1	2	8	1	1	6	39		19	1			1		1	22		5	1	1
VvXTH30	1	1	12	9	13	1	4		2	4	1			48			3	8	3			3	4	3		1	3		2	3	1	12	1		2	49	1	20				1			22		9	2
VvXTH31			12	12	17	2	4			8	3		1	59	4	6	1	8	2			3	6	1		3	5	1	1	3		12		3	1	60	3	10	2	1	1	4			21		1
VvXTH32	5			18	21	8	2		2	1			1	58		4		6				1	1	2							2				2	18	1	25	3			1			30		3
VvXTH33	1		30	11	9	4				6	1	1	1	64	4	10	1	6	3			4	1	1		2	3	1			2	30	2		2	72	2	20	1	1		1		1	26	1	2		1
VvXTH34			8	7	16	2	1		3	2			1	40	1	2	1	6	1			1	6	4		2	2	2	2	2	1	8	2	2		45	1	18				3	1		23		5
[truncated: 9 more columns]
